# Supplementary material for: Silicon and Nitrate Differentially Modulate the Symbiotic Performances of Healthy and Virus-Infected Bradyrhizobium-nodulated Cowpea (Vigna unguiculata), Yardlong Bean (V. unguiculata subsp. sesquipedalis) and Mung Bean (V. radiata)
Source: MDPI journal article supplement (doi:10.3390/plants6030040), 2017-09-15
Supplement: s1 [file s1]

# Supplementary Materials: Silicon and Nitrate Differentially Modulate the Symbiotic Performances of Healthy and Virus-Infected *Bradyrhizobium*-nodulated Cowpea (*Vigna unguiculata*), Yardlong Bean (*V. unguiculata* subsp. *sesquipedalis*) and Mung Bean (*V. radiata*)

Maria Luisa Izaguirre-Mayoral, Miriam Brito, Bikash Baral and Mario José Garrido

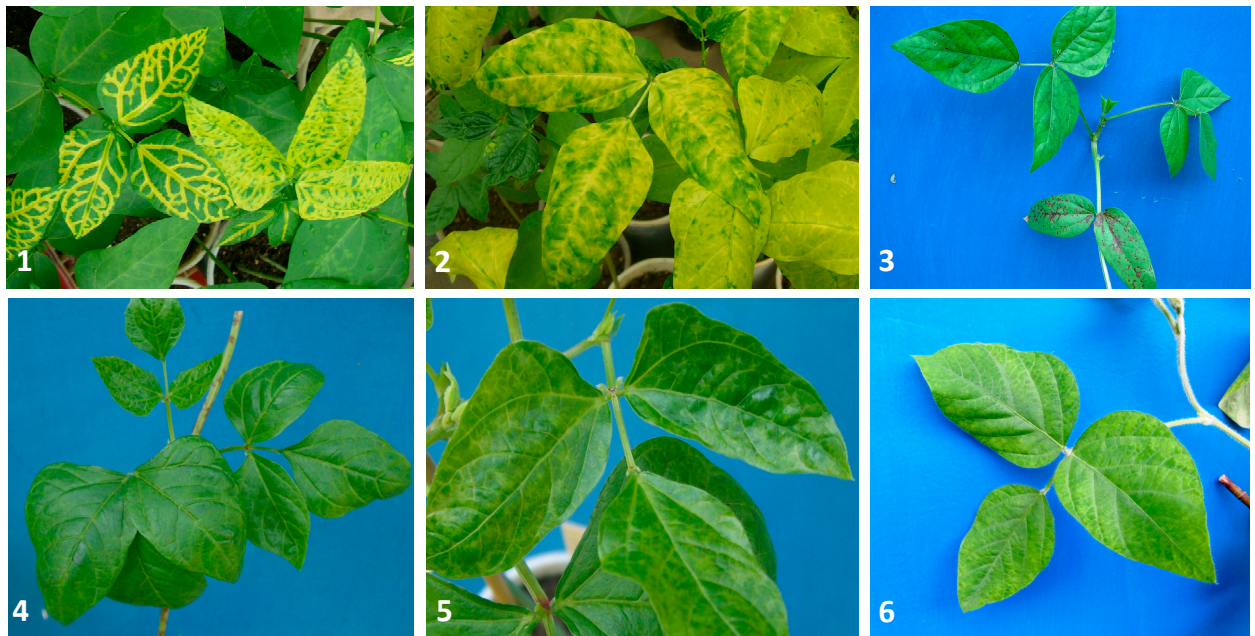

**Figure S1.** Upper photos: Symptoms elicited by *Cowpea chlorotic mottle virus* (CCMV) infection in cowpea (1), yardlong bean (2) and mung bean (3). Note in (3), the necrotic lesions in the CCMV-inoculated primary leaves. Lower photos: Symptoms elicited by *Cowpea mild mottle virus* (CMMV) infection in cowpea (4), yardlong bean (5) and mung bean (6).

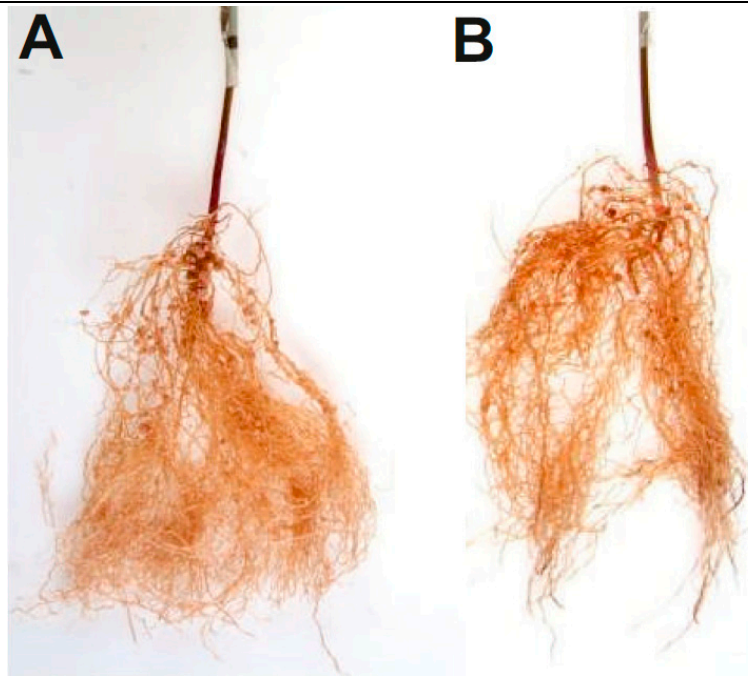

**Figure S2.** *Bradyrhizobia*-nodulated roots of 20 days old *Vigna unguiculata*; (A) healthy plants root and (B) CCMV-infected plants root.
